# Supplementary material for: The Global Financial Crisis and Overweight among Children of Single Parents: A Nationwide 10-Year Birth Cohort Study in Japan
Source: Int J Environ Res Public Health. 2019 Mar 20;16(6):1001. doi: 10.3390/ijerph16061001 (PMC6466597; doi:10.3390/ijerph16061001)
Supplement: Supplementary file 1 [file ijerph-16-01001-s001.pdf]

**Table S1. Odds ratio (OR) and 95% confidence interval (CI) for risk of overweight relative to normal weight by gender (Full results with estimated odds ratios and confidence intervals for the adjusted covariates)**

|                                                                | Model 1 |             |       |             | Model 2 |             |       |             |
|----------------------------------------------------------------|---------|-------------|-------|-------------|---------|-------------|-------|-------------|
|                                                                | Boys    |             | Girls |             | Boys    |             | Girls |             |
|                                                                | OR      | (95% CI)    | OR    | (95% CI)    | OR      | (95% CI)    | OR    | (95% CI)    |
| <b>Age (years)</b>                                             | 1.02    | (1.01-1.04) | 0.99  | (0.97-1.00) | 1.02    | (1.01-1.04) | 0.99  | (0.97-1.00) |
| <b>Parenthood</b>                                              |         |             |       |             |         |             |       |             |
| Two parents                                                    | 1.00    | (Ref.)      | 1.00  | (Ref.)      | 1.00    | (Ref.)      | 1.00  | (Ref.)      |
| Single parent                                                  | 1.14    | (0.97-1.33) | 1.09  | (0.93-1.28) | 0.97    | (0.81-1.15) | 0.94  | (0.79-1.12) |
| <b>Step term</b>                                               |         |             |       |             |         |             |       |             |
| Before September 2008                                          | 1.00    | (Ref.)      | 1.00  | (Ref.)      | 1.00    | (Ref.)      | 1.00  | (Ref.)      |
| After September 2008                                           | 1.62    | (1.51-1.72) | 1.26  | (1.18-1.35) | 1.62    | (1.51-1.73) | 1.26  | (1.18-1.35) |
| <b>Interaction between single parent in 2008 and step term</b> |         |             |       |             |         |             |       |             |
| Two parents *September 2008                                    | 1.00    | (Ref.)      | 1.00  | (Ref.)      | 1.00    | (Ref.)      | 1.00  | (Ref.)      |
| Single parents *September 2008                                 | 1.10    | (0.92-1.30) | 1.23  | (1.04-1.45) | 1.10    | (0.93-1.31) | 1.23  | (1.04-1.46) |
| <b>Household income quartile before 2008</b>                   |         |             |       |             |         |             |       |             |
| 1 (lowest)                                                     |         |             |       |             | 0.99    | (0.87-1.12) | 1.06  | (0.93-1.20) |
| 2                                                              |         |             |       |             | 1.05    | (0.93-1.18) | 0.99  | (0.87-1.12) |
| 3                                                              |         |             |       |             | 0.93    | (0.83-1.05) | 0.92  | (0.81-1.04) |
| 4 (highest)                                                    |         |             |       |             | 1.00    | (Ref.)      | 1.00  | (Ref.)      |
| <b>&gt;30% negative income change during economic crisis</b>   |         |             |       |             |         |             |       |             |
| No                                                             |         |             |       |             | 1.00    | (Ref.)      | 1.00  | (Ref.)      |
| Yes                                                            |         |             |       |             | 1.10    | (0.96-1.25) | 1.02  | (0.88-1.17) |
| <b>Mother's education</b>                                      |         |             |       |             |         |             |       |             |
| Junior high school                                             |         |             |       |             | 1.00    | (Ref.)      | 1.00  | (Ref.)      |
| High School                                                    |         |             |       |             | 0.70    | (0.57-0.86) | 0.62  | (0.50-0.77) |
| Vocational School                                              |         |             |       |             | 0.64    | (0.52-0.79) | 0.50  | (0.41-0.63) |
| Higher Education                                               |         |             |       |             | 0.62    | (0.49-0.78) | 0.46  | (0.36-0.58) |
| <b>Father's education</b>                                      |         |             |       |             |         |             |       |             |
| Junior high school                                             |         |             |       |             | 1.00    | (Ref.)      | 1.00  | (Ref.)      |
| High School                                                    |         |             |       |             | 0.97    | (0.82-1.14) | 0.91  | (0.78-1.10) |
| Vocational School                                              |         |             |       |             | 0.92    | (0.77-1.10) | 0.87  | (0.75-1.08) |
| Higher Education                                               |         |             |       |             | 0.75    | (0.63-0.90) | 0.76  | (0.65-0.94) |
| <b>Mother's age</b>                                            |         |             |       |             |         |             |       |             |
| < 20 years                                                     |         |             |       |             | 1.00    | (Ref.)      | 1.00  | (Ref.)      |
| 21-25 years                                                    |         |             |       |             | 0.84    | (0.54-1.30) | 1.10  | (0.63-2.25) |
| 26-30 years                                                    |         |             |       |             | 0.88    | (0.57-1.37) | 1.18  | (0.62-2.24) |

|                                   |             |             |             |             |
|-----------------------------------|-------------|-------------|-------------|-------------|
| >30 years                         | 0.97        | (0.63-1.52) | 1.24        | (0.65-2.35) |
| <b>Father's age</b>               |             |             |             |             |
| < 20 years                        | 1.00 (Ref.) |             | 1.00 (Ref.) |             |
| 21-25 years                       | 2.25        | (1.17-4.33) | 0.79        | (0.36-1.77) |
| 26-30 years                       | 1.90        | (0.99-3.68) | 0.87        | (0.39-1.95) |
| >30 years                         | 2.21        | (1.14-4.27) | 1.06        | (0.47-2.38) |
| <b>Residential area</b>           |             |             |             |             |
| 20 designated cities              | 1.00 (Ref.) |             | 1.00 (Ref.) |             |
| other cities                      | 1.07        | (0.98-1.18) | 1.16        | (1.05-1.27) |
| Rural                             | 1.14        | (0.99-1.32) | 1.41        | (1.22-1.64) |
| <b>Three generation household</b> |             |             |             |             |
| No                                | 1.00 (Ref.) |             | 1.00 (Ref.) |             |
| Yes                               | 1.39        | (1.27-1.52) | 1.27        | (1.16-1.39) |

---

A generalized estimating equation model with an exchangeable correlation structure was used for the analysis

Robust standard errors were used to calculate 95% confidence intervals

Model 2 was adjusted for household income quartile before 2008, onset of 30 % or more negative income change during economic crisis, mother's education, father's education, mother's age at birth, father's age at birth, residential area, and three generation household

**Table S2. Odds ratio (OR) and 95% confidence interval (CI) for risk of overweight relative to normal weight by gender and parental reception of social support**

|                                                                | Boys                  |             |            |             | Girls                 |             |            |             |
|----------------------------------------------------------------|-----------------------|-------------|------------|-------------|-----------------------|-------------|------------|-------------|
|                                                                | Having social support |             | No support |             | Having social support |             | No support |             |
|                                                                | OR                    | (95% CI)    | OR         | (95% CI)    | OR                    | (95% CI)    | OR         | (95% CI)    |
| <b>Changes in single parental status between 2008 and 2009</b> |                       |             |            |             |                       |             |            |             |
| Two parents                                                    |                       | 1.00 (Ref.) |            | 1.00 (Ref.) |                       | 1.00 (Ref.) |            | 1.00 (Ref.) |
| Single parent                                                  | 0.93                  | (0.75-1.16) | 1.00       | (0.75-1.33) | 0.94                  | (0.75-1.18) | 0.91       | (0.69-1.20) |
| <b>Step term</b>                                               |                       |             |            |             |                       |             |            |             |
| Before September 2008                                          |                       | 1.00 (Ref.) |            | 1.00 (Ref.) |                       | 1.00 (Ref.) |            | 1.00 (Ref.) |
| After September 2008                                           | 1.59                  | (1.45-1.74) | 1.66       | (1.50-1.82) | 1.27                  | (1.15-1.39) | 1.26       | (1.14-1.38) |
| <b>Interaction between single parent in 2008 and step term</b> |                       |             |            |             |                       |             |            |             |
| Two parents *September 2008                                    |                       | 1.00 (Ref.) |            | 1.00 (Ref.) |                       | 1.00 (Ref.) |            | 1.00 (Ref.) |
| Single parent*September 2008                                   | 1.01                  | (0.80-1.28) | 1.25       | (0.96-1.63) | 1.18                  | (0.94-1.48) | 1.31       | (1.00-1.71) |

A generalized estimating equation model with an exchangeable correlation structure was used for the analysis

Robust standard errors were used to calculate 95% confidence intervals

Model 2 was adjusted for household income quartile before 2008, onset of 30 % or more negative income change during economic crisis, mother's education, father's education, mother's age at birth, father's age at birth, residential area, and three generation household
